# Supplementary material for: Deficiency of C3a receptor attenuates the development of diabetic nephropathy
Source: PubMed Central journal article supplement — BMJ Open Diabetes Res Care. 2019 Nov 15;7(1):e000817. doi: 10.1136/bmjdrc-2019-000817 (PMC6861086; doi:10.1136/bmjdrc-2019-000817), 2019-11-15
Supplement: bmjdrc-2019-000817supp004.pdf [file bmjdrc-2019-000817supp004.pdf]

**Supplementary Table 1. General data of DN patients**

| Parameter                           | Value        |
|-------------------------------------|--------------|
| Number of patients                  | 22           |
| Gender (male/female)                | 16/6         |
| Age, year                           | 46.09±2.54   |
| Known duration of diabetes, year    | 10.71±1.54   |
| HbA1c, %                            | 7.48±0.48    |
| FPG, mmol/L                         | 7.11±0.75    |
| Serum albumin, g/L                  | 31.06±1.31   |
| Triglycerides, mmol/L               | 10.26±7.78   |
| Cholesterol, mmol/L                 |              |
| Total                               | 5.53±0.47    |
| LDL                                 | 3.08±0.39    |
| HDL                                 | 0.97±0.05    |
| ESR, mm/1hr                         | 52.63±7.00   |
| Serum creatinine, µmol/L            | 159.43±15.04 |
| Urinary protein, g/24 hours         | 5.86±0.94    |
| eGFR, ml/minute/1.73 m <sup>2</sup> | 51.08±6.00   |

**[Abbreviations]** DN, diabetic nephropathy; eGFR, estimated glomerular filtration rate; ESR, erythrocyte sedimentation rate; FPG, fasting plasma glucose; HbA1c, hemoglobin A1c; HDL, high-density lipoprotein; LDL, low-density lipoprotein.

**Supplementary Table 2. Primer sequences used in qRT-PCR**

|              | Forward primer       | Reverse primer          |
|--------------|----------------------|-------------------------|
| <i>Il1β</i>  | AGCTCTCCACCTCAATGGAC | TGCTTGGGATCCACACTCT     |
| <i>Il4</i>   | GGTCTCAACCCCAGCTAGT  | GCCGATGATCTCTCTCAAGTGAT |
| <i>Il6</i>   | ACTTACAAGTCCGGAGAGG  | TTGCCATTGCACAACCTCTT    |
| <i>Il18</i>  | CTTCTGCAACCTCCAGCATC | GTGAAGTCGGCCAAAGTTGT    |
| <i>Il23</i>  | GCAGCTCTCTCGGAATCTCT | AAGCAGAAGTGGCTGTTGTC    |
| <i>Il27</i>  | CGCAGGGAATTCACAGTCAG | GTGGACATAGCCCTGAACCT    |
| <i>Tgf</i>   | CAGACATTCGGGAAGCAGTG | TCCACATGTTGCTCCACAC     |
| <i>Tnf</i>   | ACAAGATGCTGGGACAGTGA | ACATTCGAGGCTCCAGTGAA    |
| <i>18S</i>   | GTAACCCGTTGAACCCATT  | CCATCCAATCGGTAGTAGCG    |
| <i>Cxcl9</i> | GAGGCTCACGTCACCAAATC | CAACTCTGGTGGTCTCCACT    |
| <i>Cxcr3</i> | GCCAAGCCATGTACCTTGAG | AGTCAGAGAAGTCGCTCTCG    |
| <i>Cd3d</i>  | GTCCATTACCGAATGTGCCA | CGGTCTCATGTCCTGCAAAG    |
| <i>Ltb</i>   | TCATAGGCGCTTGGATGAGT | CGACGTGGCAGTAGAGGTAA    |
| <i>Zap70</i> | TGGACTTCATCAAGCAGGGT | GCGATCCTCCCACTGTAGA     |

### Supplementary Figure Legends

**Supplementary Figure S1. 2D-PCA plot.** The blue spots represent the wild type control group; the red spots represent the *C3aR*<sup>-/-</sup> control group; The dark brown spots represent the wild type diabetic group; the yellow ochre spots represent the *C3aR*<sup>-/-</sup> diabetic group.

Abbreviations: Ctrl, control; KO, knockout; STZ, streptozotocin; WT, wild type.

**Supplementary Figure S2. 3D-PCA plot.** The blue spots represent the wild type diabetic group; the red spots represent the *C3aR*<sup>-/-</sup> diabetic group.

Abbreviations: STZ, streptozotocin; WT, wild type.

### Supplementary Figure S3. C3aR deficiency decreased renal T cells and macrophages infiltration in diabetic mice

Representative immunohistochemical staining of renal CD4<sup>+</sup> T cells in diabetic mice, Bar=100μm (A) and semiquantitative analysis (B). Representative immunohistochemical staining of CD8<sup>+</sup> T cells in diabetic mice, Bar=100μm (C) and semiquantitative analysis (D). Representative immunohistochemical staining of renal macrophages infiltration in diabetic mice, Bar=100μm (E) and semiquantitative analysis (F). \*\*\**p* < 0.001; \*\**p* < 0.01; \**p* < 0.05.

Abbreviations: WT, wild type.
