# Supplementary figures and images for: Deficiency of C3a receptor attenuates the development of diabetic nephropathy
Source: PubMed Central journal article supplement — BMJ Open Diabetes Res Care. 2019 Nov 15;7(1):e000817. doi: 10.1136/bmjdrc-2019-000817 (PMC6861086; doi:10.1136/bmjdrc-2019-000817), 2019-11-15

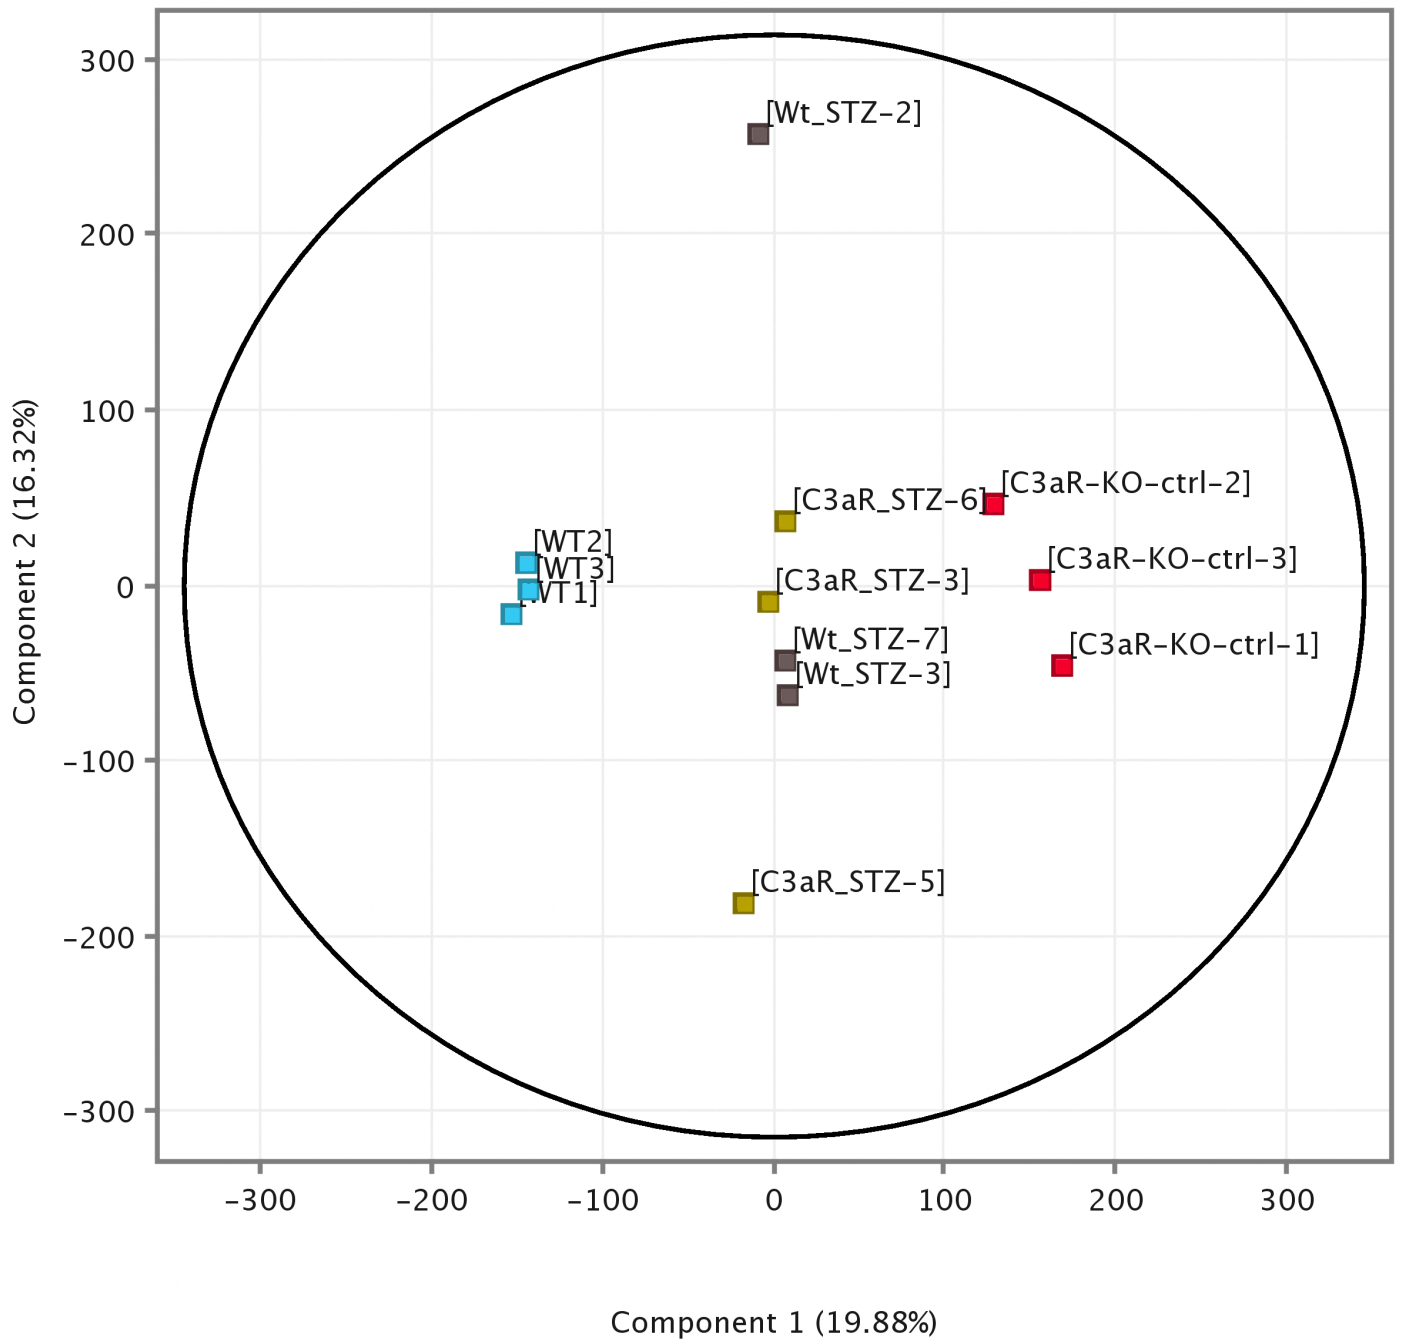

Supplement: bmjdrc-2019-000817supp001.pdf [file bmjdrc-2019-000817supp001.pdf]

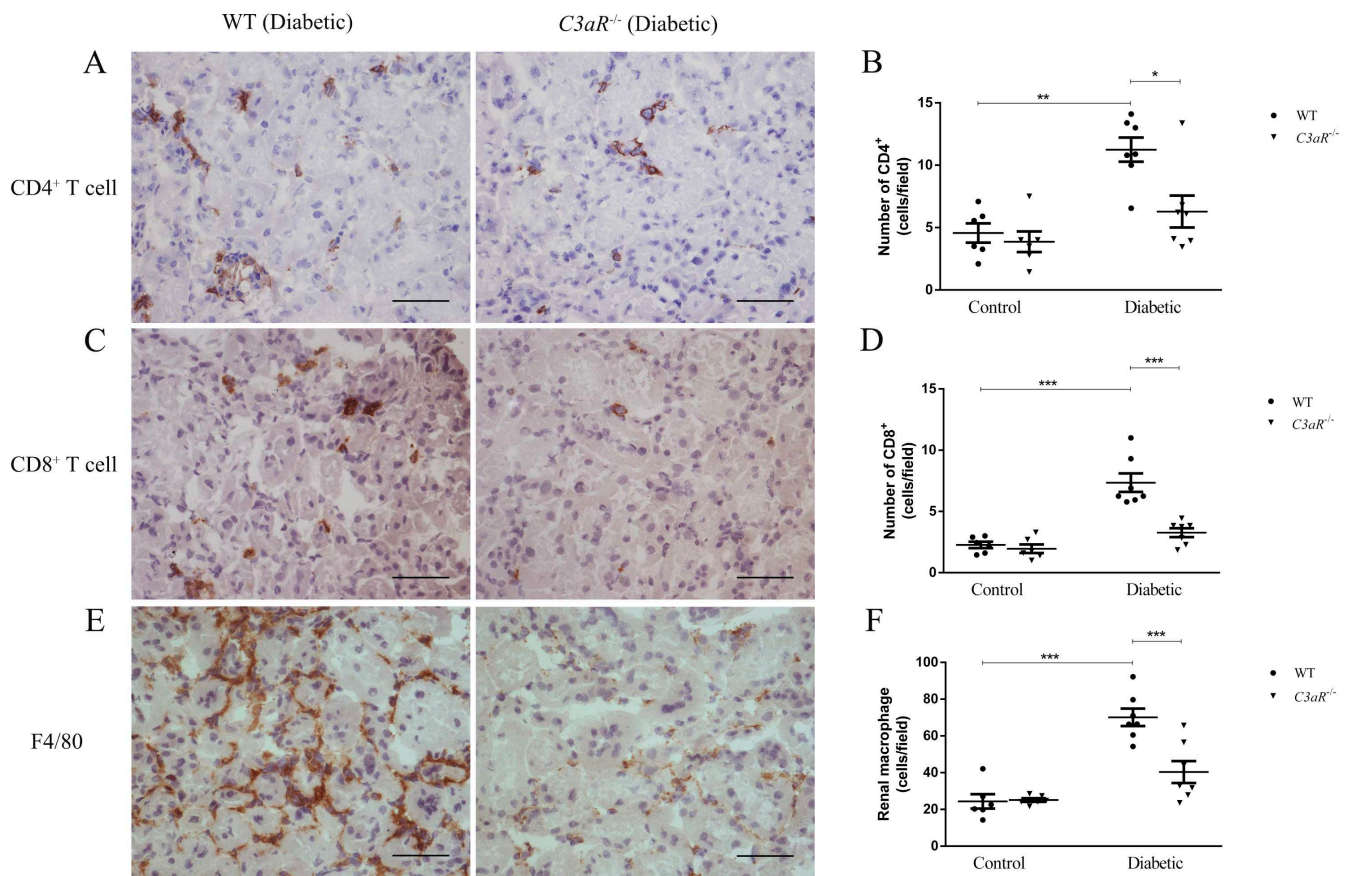

Supplement: bmjdrc-2019-000817supp003.pdf [file bmjdrc-2019-000817supp003.pdf]
